# Supplementary material
Source: publisher figshare collection journal article supplement (https://karger.figshare.com/articles/dataset/_/5125024)
Supplement: Supplementary file 1 [file 1]

Archive with 9 entries (9 files):
- 000351099_sm_Figures.pdf
- 000351099_sm_Figure_1.gif
- 000351099_sm_Figure_1.tif.org
- 000351099_sm_Figure_2.gif
- 000351099_sm_Figure_2.tif.org
- 000351099_sm_Legends.doc
- 000351099_sm_Tables.pdf
- 000351099_sm_Table_1.doc
- 000351099_sm_Table_2.doc
