# Supplementary material
Source: publisher figshare collection journal article supplement (https://karger.figshare.com/articles/dataset/_/5125024)
Supplement: Supplementary file 1 [file 1 › 000351099_sm_Tables.pdf]

## Supplemental Material

**Supplemental Table S1: Pathology Reports for 17 patients**

| Patient | Diagnosis                                                                                                                                                                                                  | Pattern Grade | Nuclear Grade      | Mitotic Index | Nottingham Grade | Lympho-vascular Invasion | Tumor Size                                              |
|---------|------------------------------------------------------------------------------------------------------------------------------------------------------------------------------------------------------------|---------------|--------------------|---------------|------------------|--------------------------|---------------------------------------------------------|
| #001    | Invasive intraductal carcinoma                                                                                                                                                                             | III           | III                | III           | III              | No                       | 1.3 cm                                                  |
| #002    | Invasive ductal carcinoma                                                                                                                                                                                  | III           | II                 | I             | II               | No                       | 8.0 mm                                                  |
| #003    | Invasive ductal carcinoma with malignant heterologous chondroid/matrix and osteoclastic component<br><br>Comedo carcinoma in situ<br><br>Retrograde ductal and lobular involvement away from visible tumor | III           | III<br><br><br>III | III           | III              | No                       | 2.5 cm                                                  |
| #004    | Invasive ductal carcinoma<br><br>Ductal carcinoma in situ within invasive component                                                                                                                        | II<br><br>II  | II                 | I             | I                | No                       | 1.3 cm                                                  |
| #005    | Invasive ductal carcinoma<br><br>Intraductal carcinoma with lobular extension                                                                                                                              | II            | II                 | III           | II               | No                       | 2.5 cm                                                  |
| #006    | Invasive ductal carcinoma<br><br>Ductal carcinoma in situ                                                                                                                                                  | I             | II<br><br>II       | I             | I                | No                       | 6.0 mm (Invasive)<br><br>3.0 cm (In situ)               |
| #007    | Invasive and multiple foci of micro-invasive ductal carcinoma                                                                                                                                              | III           | III                | II            | III              | Yes                      | 0.5 cm (Invasive)<br><br>3.0 cm (Intraductal carcinoma) |
| #008    | Invasive ductal carcinoma                                                                                                                                                                                  | III           | III                | III           | III              | Yes                      | 1.4 cm                                                  |

|             |                                                                                    |      |     |     |      |          |              |
|-------------|------------------------------------------------------------------------------------|------|-----|-----|------|----------|--------------|
|             |                                                                                    |      |     |     |      |          |              |
| <b>#009</b> | Invasive ductal carcinoma                                                          | III  | III | II  | III  | Yes      | 2.2 cm       |
| <b>#010</b> | Residual invasive ductal carcinoma at periphery of previous site of tumor excision | III  | III | II  | III  | No       | 1.3 cm       |
| <b>#011</b> | Invasive ductal carcinoma                                                          | III  | III | III | III  | Possible | 0.9 cm       |
|             | Ductal carcinoma in situ                                                           | II   |     |     |      |          |              |
| <b>#012</b> | Invasive ductal carcinoma with mucinous differentiation                            | III  | II  | I   | II   | Yes      | 3.0 cm       |
|             | Ductal carcinoma in situ (minor)                                                   |      | II  |     |      |          |              |
| <b>#013</b> | Invasive ductal carcinoma                                                          | III  | II  | I   | II   | No       | 7.0 mm       |
| <b>#014</b> | Invasive lobular carcinoma                                                         | III  | II  | II  | II   | Yes      | 2.8 x 6.1 cm |
| <b>#015</b> | Invasive ductal carcinoma                                                          | I-II | III | I   | I-II | Yes      | 1.8 cm       |
|             | Ductal carcinoma in situ                                                           |      |     |     |      |          |              |
|             | Intraductal carcinoma                                                              |      | III |     |      |          |              |
| <b>#016</b> | Invasive ductal carcinoma                                                          | III  | III | III | III  | Possible | 2.3 cm       |
| <b>#017</b> | Ductal hyperplasia - benign                                                        | N/A  | N/A | N/A | N/A  | N/A      | N/A          |

#### Additional details:

- #001:** Focal chronic inflammation and fibrosis; ER (Estrogen Receptor; weakly positive); PR (Progesterone Receptor; negative); HER2 (Human EGF Receptor 2; negative).
- #002:** Although the invasive carcinoma is only 8 mm, there is extensive in situ carcinoma (nuclear grade II) with some necrosis; ER (positive); PR (positive); HER2 (negative).
- #003:** Fibrocystic changes with adenosis; mild intraductal hyperplasia; focal micro-calcifications; extensive necrosis; unequivocal lymphovascular invasion is not noted; ER (negative); PR (negative); HER2 (negative).
- #004:** Dense lymphocyte infiltration (invasive ductal carcinoma); solid tumor with central necrosis (ductal carcinoma in situ within invasive component); ER (positive); PR (positive); HER2 (positive).

- #005:** Solid and cribriform type with necrosis; mild peri-tumoral host lympho-plasmacytic response; microcysts; adenosis; ER (positive); PR (positive); HER2 (positive).
- #006:** Solid and cribriform with central necrosis and lobular extension; micro-calcifications associated with ductal carcinoma in situ; fibrocystic changes; fibrous stroma and microcysts; multiple microscopic foci of ductal carcinoma in situ; foci of intraductal carcinoma; intraductal papillomatosis; metaplasia adenosis; apocrine; atypical ductal hyperplasia; non-atypical ductal hyperplasia; ER (positive); PR (positive); HER2 (negative).
- #007:** Extensive intraductal carcinoma, comedo, cribriform and micropapillary types; focal necrosis; lobular extension; micro-calcifications associated with benign ducts and intraductal carcinoma; atypical lobular hyperplasia focally involving sclerosing adenosis; ER (weakly positive); PR (negative); HER2 (positive).
- #008:** Coagulative necrosis; focal lymphovascular invasion is noted; ER (positive); PR (positive); HER2 (positive).
- #009:** Moderate desmoplasia associated with tumor, but no inflammatory response; focal intraductal carcinoma; capsular and extra-capsular extension of cancer into surrounding adipose; benign fibrocystic changes; adenosis; ER (positive); PR (weakly negative); HER2 (negative). Unequivocal lymphovascular invasion is not noted; ER (positive); PR (positive); HER2 (negative).
- #010:** Unequivocal lymphovascular invasion is not noted; ER (positive); PR (positive); HER2 (negative).
- #011:** Focal peri-neural invasion (invasive ductal carcinoma); necrosis, cribriform (ductal carcinoma in situ); adenosis; benign intraductal papillary hyperplasia; ER (positive); PR (positive); HER2 (positive).
- #012:** Tubule formation grade III (invasive ductal carcinoma); cribriform without necrosis (ductal carcinoma in situ); micro-calcifications associated with benign ducts; fibrocystic changes; ER (positive); PR (negative); HER2 (negative).
- #013:** Tubule formation grade III; brisk peri- and intra-tumoral host lymphocytic response; micro-calcifications associated with benign lobules and fibrocystic changes; stromal fibrosis; microcysts; apocrine metaplasia; focal non-atypical ductal hyperplasia; ER (positive); PR (weakly positive); HER2 (negative).
- #014:** No microcalcification; ER (positive); PR (weakly positive); HER2 (negative).
- #015:** Cribriform with focal necrosis; fibrocystic changes; benign focal intraductal hyperplasia; ER (positive); PR (positive); HER2 (positive).
- #016:** Foci of in situ comedo carcinoma; foci of intraductal carcinoma; considerable desmoplasia; minimal inflammatory response; fibrocystic changes; focal intraductal hyperplasia; ER (positive); PR (positive); HER2 (negative).
- #017:** Fibrocystic changes; moderate intraductal hyperplasia; micro-calcifications.

## Supplemental Material

**Supplemental Table S2: Effect of methyl sulfone on cellular organization in cultured normal and cancerous human breast tissue**

| Sample | Tissue | Medium | Total time in culture (days) | Time in culture before adding MS (days) | Time in culture after adding MS (days) | Cellular organization one day after plating (no MS) | Cellular organization cultured with no MS (days) | Cellular organization cultured with MS (days) |
|--------|--------|--------|------------------------------|-----------------------------------------|----------------------------------------|-----------------------------------------------------|--------------------------------------------------|-----------------------------------------------|
| #001   | N, C   | DMEM   | 33                           | 1                                       | 32                                     | N-chaotic<br>C-chaotic                              | N-chaotic (33)<br>C-chaotic (33)                 | N-structured (32)<br>C-structured (32)        |
| #002   | N      | DMEM   | 33                           | 1                                       | 32                                     | N-structured                                        | N-chaotic (33)                                   | N-structured (32)                             |
| #003   | N, C   | DMEM   | 33                           | 1                                       | 32                                     | N-chaotic<br>C-chaotic                              | N-chaotic (33)<br>C-chaotic (33)                 | N-structured (32)<br>C-structured (32)        |
| #004   | C      | DMEM   | 20                           | 13                                      | 7                                      | C-chaotic                                           | C-chaotic (20)                                   | C-structured (7)                              |
| #005   | N, C   | DMEM   | 11                           | 8                                       | 3                                      | N-chaotic<br>C-chaotic                              | N-chaotic (11)<br>C-chaotic (11)                 | N-structured (3)<br>C-structured (3)          |
| #006   | N      | DMEM   | 10                           | 7                                       | 3                                      | N-structured                                        | N-chaotic (10)                                   | N-structured (3)                              |
| #007   | N, C   | DMEM   | 12                           | 7                                       | 5                                      | N-chaotic<br>C-chaotic                              | N-chaotic (12)<br>C-chaotic (12)                 | N-structured (5)<br>C-structured (5)          |
| #008   | N, C   | WIT-P  | 25                           | 22                                      | 3                                      | N-chaotic<br>C-chaotic                              | N-chaotic (25)<br>C-chaotic (25)                 | N-structured (3)<br>C-structured (3)          |
| #009   | N, C   | WIT-P  | 29                           | 26                                      | 3                                      | N-structured<br>C-chaotic                           | N-chaotic (29)<br>C-chaotic (29)                 | N-structured (3)<br>C-structured (3)          |
| #010   | N, C   | WIT-P  | 45                           | 38                                      | 7                                      | N-structured<br>C-chaotic                           | N-chaotic (45)<br>C-chaotic (45)                 | N-structured (7)<br>C-structured (7)          |
| #011   | N      | WIT-P  | 90                           | 30                                      | 60                                     | N-chaotic                                           | N-chaotic (90)                                   | N-structured (60)                             |
| #012   | N, C   | WIT-P  | 35                           | 13                                      | 22                                     | N-structured<br>C-chaotic                           | N-chaotic (35)<br>C-chaotic (35)                 | N-structured (22)<br>C-structured (22)        |
| #013   | N, C   | WIT-P  | 57                           | 1                                       | 56                                     | N-chaotic<br>C-chaotic                              | N-chaotic (57)<br>C-chaotic (57)                 | N-structured (56)<br>C-structured (56)        |
| #014   | N, C   | WIT-P  | 44                           | 8                                       | 36                                     | N-chaotic<br>C-chaotic                              | N-chaotic (44)<br>C-chaotic (44)                 | N-structured (36)<br>C-structured (36)        |
| #015   | N, C   | WIT-P  | 50                           | 19                                      | 31                                     | N-chaotic<br>C-chaotic                              | N-chaotic (50)<br>C-chaotic (50)                 | N-structured (31)<br>C-structured (31)        |
| #016   | N      | WIT-P  | 49                           | 19                                      | 30                                     | N-structured                                        | N-chaotic (49)                                   | N-structured (30)                             |
| #017   | N      | WIT-P  | 90                           | 45                                      | 45                                     | N-chaotic                                           | N-chaotic (90)                                   | N-structured (45)                             |

**Definitions:**

- **N:** normal tissue;
- **C:** cancerous tissue;
- **Cellular Organization-chaotic:** cultured tissue had little or no definition between cells; nuclei were found at multiple levels; cell boundaries were not well defined; overlapping cellular extensions existed between cells; where visible, nuclei were often pleomorphic; cells never appeared contact inhibited
- **Cellular organization-structured:** good definition between cells; nuclei were found in one plane of the microscope field; shape of nuclei was not pleomorphic; cell boundaries were well defined; cells often appeared to be contact inhibited.
