# Supplementary material
Source: publisher figshare collection journal article supplement (https://karger.figshare.com/articles/dataset/_/5125024)

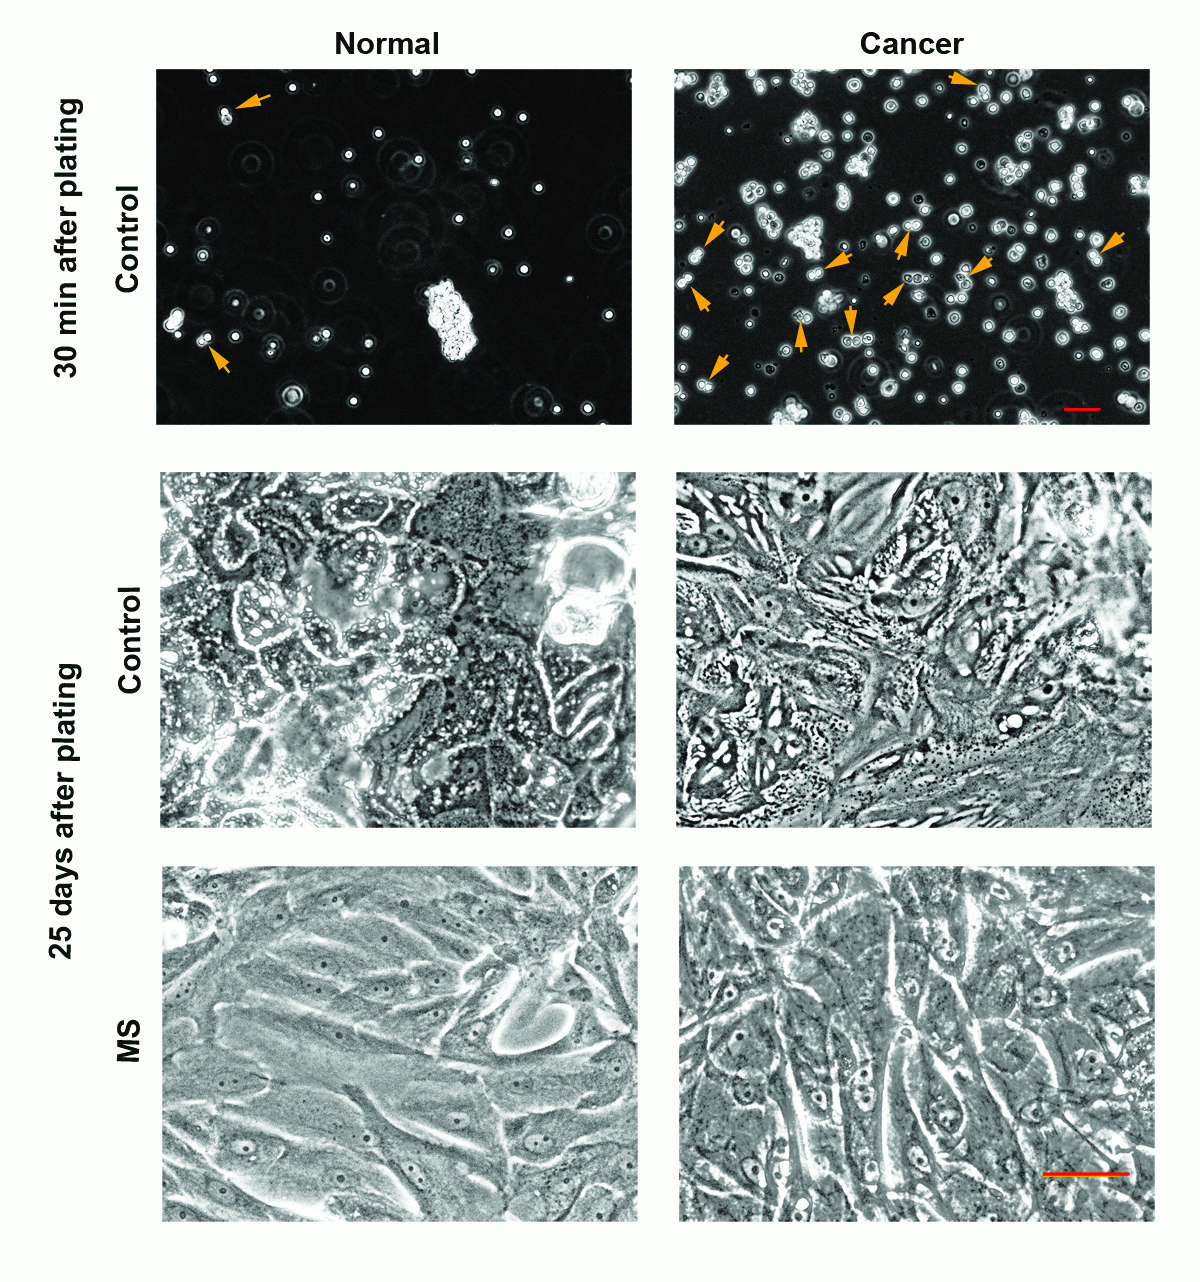

Supplement: Supplementary file 1 [file 1 › 000351099_sm_Figure_1.gif]

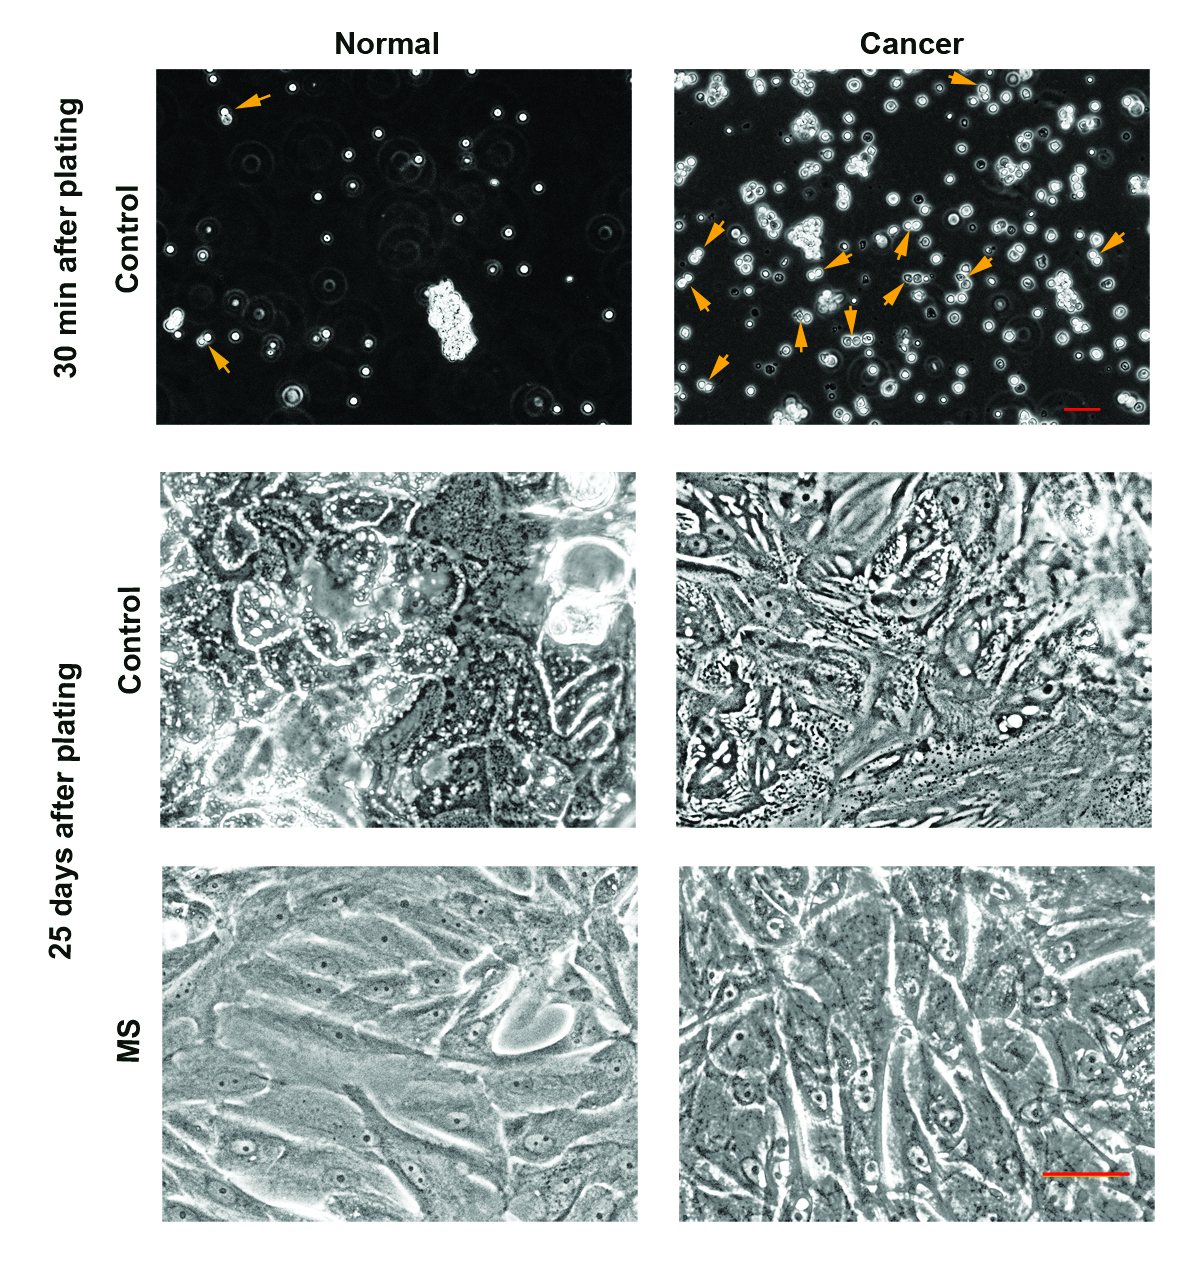

Supplement: Supplementary file 1 [file 1 › 000351099_sm_Figure_1.tif.org]

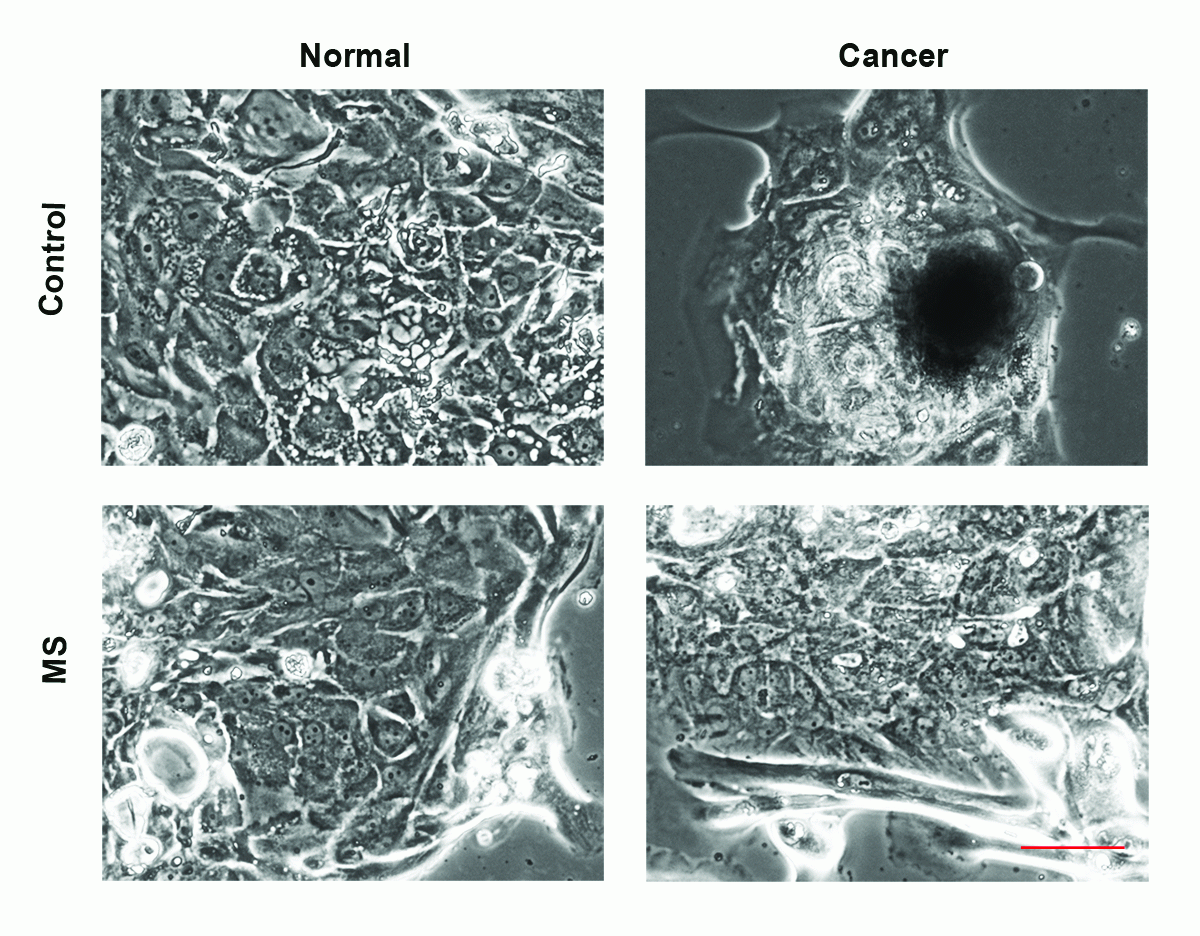

Supplement: Supplementary file 1 [file 1 › 000351099_sm_Figure_2.gif]

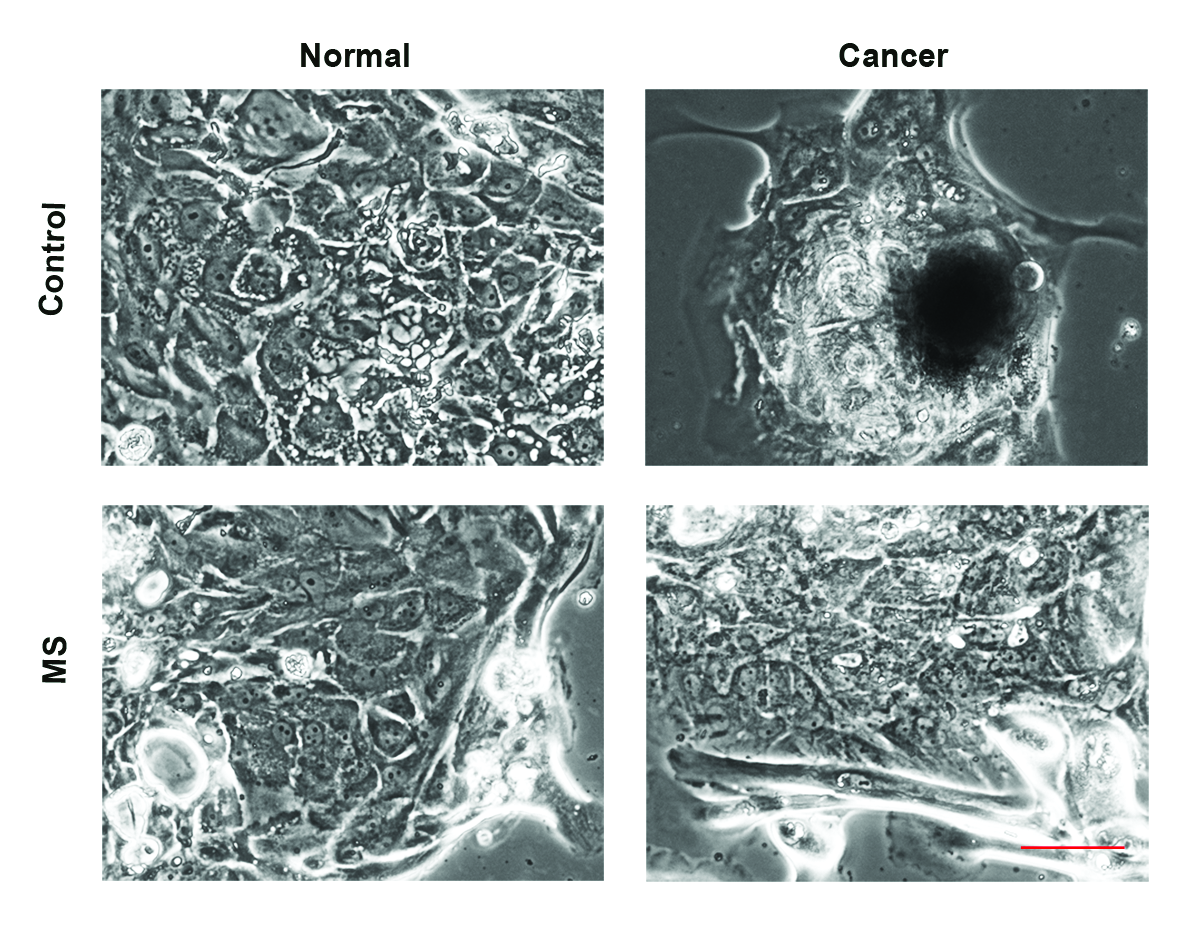

Supplement: Supplementary file 1 [file 1 › 000351099_sm_Figure_2.tif.org]
